# Supplementary material
Source: PubMed Central journal article supplement (PMC553310)
Supplement: pnas_102_10_3703__1.pdf [file pnas_102_10_3703__1.pdf]

**Table 4. Genes known to be induced during flagellar regeneration**

| <u>Gene</u><br><u>identification</u> | <u>30 min, %</u> | <u>45 min, %</u> | <u>120 min, %</u> |
|--------------------------------------|------------------|------------------|-------------------|
| 167398 DLC5                          | -20.88           | -15.26           | -11.58            |
| 168923 PF6                           | -5.69            | 34.6             | -30.05            |
| 158670                               | -4.1             | 16.43            | 7.14              |
| 159590                               | -1.86            | -27.63           | -1.13             |
| 165162 ODA5                          | -0.4             | -11.64           | 2.73              |
| 169516 DHC2                          | 1.63             | 4.81             | -7.89             |
| 159662 FA1                           | 10.92            | 0.2              | -0.61             |
| 157246                               | 19.49            | 20.12            | 27.04             |
| 157793                               | 23.53            | 26.8             | 6.53              |
| 163484                               | 24.01            | 15.86            | -4.08             |
| 169293                               | 25.39            | 9.84             | -16.11            |
| 165004                               | 25.85            | 31.32            | 5.78              |
| 168565                               | 30.25            | -4.18            | -14.56            |
| 153422                               | 31.21            | 6.02             | -6.38             |
| 169882                               | 41.2             | 13.25            | 9.73              |
| 153053                               | 47.19            | 23.29            | -1.24             |
| 159155                               | 54.96            | 27.24            | -13.87            |
| 158615                               | 60.01            | 40.31            | 8.66              |
| 158194 FLA10                         | 61.09            | 45.16            | 0.6               |
| 158033                               | 71.88            | 66.67            | -8.88             |
| 163664                               | 74.46            | 23.13            | 1.15              |
| <b>157052 MBO2</b>                   | <b>76.19</b>     | <b>40.82</b>     | <b>-5.26</b>      |
| <b>153708 LF4</b>                    | <b>81.06</b>     | <b>27.19</b>     | <b>12.12</b>      |
| <b>163277</b>                        | <b>91.26</b>     | <b>41.44</b>     | <b>-14.82</b>     |
| <b>165115</b>                        | <b>91.7</b>      | <b>79.72</b>     | <b>11.98</b>      |
| <b>166736 IDA7</b>                   | <b>92.65</b>     | <b>42.85</b>     | <b>3.51</b>       |
| <b>164264</b>                        | <b>100</b>       | <b>22.26</b>     | <b>-23.52</b>     |
| <b>167776</b>                        | <b>110.06</b>    | <b>37.1</b>      | <b>33.84</b>      |
| <b>156043</b>                        | <b>116.06</b>    | <b>48.75</b>     | <b>9.94</b>       |
| <b>164149</b>                        | <b>117.95</b>    | <b>77.94</b>     | <b>6.19</b>       |
| <b>166131 PF20</b>                   | <b>118.52</b>    | <b>43.45</b>     | <b>31.97</b>      |
| <b>157798 ODA3</b>                   | <b>127.93</b>    | <b>33.57</b>     | <b>1</b>          |
| <b>164561</b>                        | <b>129.22</b>    | <b>93.45</b>     | <b>24.46</b>      |
| <b>158863</b>                        | <b>134.99</b>    | <b>49.99</b>     | <b>-2.5</b>       |
| <b>162279 RSP3</b>                   | <b>143.86</b>    | <b>56.65</b>     | <b>6.06</b>       |
| <b>171911</b>                        | <b>153.4</b>     | <b>43.84</b>     | <b>-9.11</b>      |
| <b>163193</b>                        | <b>161.35</b>    | <b>80.24</b>     | <b>-6.28</b>      |
| <b>154393 IFT52</b>                  | <b>168.36</b>    | <b>81.09</b>     | <b>5.86</b>       |
| <b>164100 ODA6</b>                   | <b>170.31</b>    | <b>81</b>        | <b>4.73</b>       |
| <b>153853</b>                        | <b>196.25</b>    | <b>75.98</b>     | <b>7.61</b>       |
| <b>159749</b>                        | <b>212.19</b>    | <b>180.48</b>    | <b>37.7</b>       |

|        |                |               |               |               |
|--------|----------------|---------------|---------------|---------------|
| 153658 |                | <b>220.27</b> | <b>157.04</b> | <b>-1.71</b>  |
| 161253 |                | <b>221.12</b> | <b>27.38</b>  | <b>2.99</b>   |
| 156948 | <b>IFT57</b>   | <b>232.55</b> | <b>56.82</b>  | <b>19</b>     |
| 171602 |                | <b>302.64</b> | <b>147.04</b> | <b>109.3</b>  |
| 159247 |                | <b>334.95</b> | <b>35.71</b>  | <b>-20.73</b> |
| 164620 | <b>TUA1</b>    | <b>345.71</b> | <b>192.45</b> | <b>114.43</b> |
| 171096 | <b>PF16</b>    | <b>367.77</b> | <b>123.03</b> | <b>-4.21</b>  |
| 160297 |                | <b>371.12</b> | <b>219.34</b> | <b>83.35</b>  |
| 157967 | <b>RSP4</b>    | <b>382.67</b> | <b>240.87</b> | <b>30.47</b>  |
| 165606 |                | <b>389.99</b> | <b>208.84</b> | <b>67.13</b>  |
| 170055 | <b>TUB2</b>    | <b>418.67</b> | <b>214.58</b> | <b>97.42</b>  |
| 171102 |                | <b>431.1</b>  | <b>197.22</b> | <b>16.93</b>  |
| 168339 |                | <b>443.1</b>  | <b>126.61</b> | <b>-7.46</b>  |
| 160952 | <b>ODA-DC3</b> | <b>676.09</b> | <b>213.18</b> | <b>43.84</b>  |
| 162703 |                | <b>724.23</b> | <b>436.64</b> | <b>87.7</b>   |

Data set used to validate microarray detection of induction of transcripts and the strategy of flagellar gene identification based on induction during flagellar regeneration. Entries in bold type indicate at least 75% induction at either 30 or 45 min after initiation of flagellar regeneration. Plain text indicates genes classified as not induced according to this same criterion. Within each list, entries are sorted in increasing order of induction at  $t = 30$  min. The gene list consists of the strongly induced genes from the RT-PCR analysis of Li *et al.* (1), plus 20 *Chlamydomonas* genes (as indicated) whose induction has been reported in the literature based on Northern blot analysis.

1. Li, J. B., Gerdes, J. M., Haycraft, C. J., Fan, Y., Teslovich, T. M., May-Simera, H., Li, H., Blacque, O. E., Li, L., Leitch, C. C., *et al.* (2004) *Cell* **117**, 541-552.
