# Supplementary material
Source: PubMed Central journal article supplement (PMC553310)
Supplement: pnas_102_10_3703__2.pdf [file pnas_102_10_3703__2.pdf]

**Table 5. Genes known to not be induced during flagellar regeneration**

| <u>Gene</u>           |                  |                  |                   |
|-----------------------|------------------|------------------|-------------------|
| <u>identification</u> | <u>30 min, %</u> | <u>45 min, %</u> | <u>120 min, %</u> |
| 158239                | -45.89           | -46.98           | -24.85            |
| 166667                | -41.33           | -47.33           | -47.79            |
| 171242                | -39.75           | -9.63            | 105.39            |
| 171299                | -35.25           | -27.41           | -33.95            |
| 158560                | -27.97           | -35.55           | 29.5              |
| 168391 RBCS2          | -25.38           | -32.96           | -1.52             |
| 162000                | -21.88           | -37.58           | 56.8              |
| 169942                | -21.45           | -24.52           | -18.7             |
| 158402                | -19.33           | -26.86           | 5.77              |
| 165846                | -19.08           | 2.27             | -16.83            |
| 161792                | -18.1            | -27.43           | -22.81            |
| 165904 CRY1           | -18.1            | -51.04           | -3.18             |
| 165247 Cblp           | -17.46           | -50.04           | -21.45            |
| 162224                | -16.43           | -32.88           | -2.81             |
| 156229                | -16.27           | -2.31            | -18.13            |
| 162018                | -16.06           | -21.6            | -21.05            |
| 165072 ALD            | -13.38           | -58.89           | -37.67            |
| 165102                | -12.77           | -8.36            | -3.96             |
| 154013                | -12.36           | -10.5            | 30.87             |
| 168343                | -10.34           | -10.97           | 12.15             |
| 162907                | -10.07           | 40.77            | -23.24            |
| 156671                | -7.83            | -22.75           | 3.93              |
| 157385                | -7.8             | -9.36            | -18.8             |
| 159566                | -7.57            | -25.11           | 37.68             |
| 162058                | -7.21            | -4.31            | -0.47             |
| 168715                | -6.38            | -14.89           | -5.41             |
| 155468                | -5.1             | 25.83            | 2.75              |
| 155925                | -5.1             | 26.12            | 9.2               |
| 161779                | -4.58            | -19.44           | 17.62             |
| 165569                | -4.24            | 13.55            | -5.78             |
| 166774                | -3.69            | -20.98           | 15.43             |
| 163738                | -3.54            | -12.68           | -10.14            |
| 155451                | -3.06            | -7.51            | 8.34              |
| 171166                | -1.98            | 2.02             | -12.48            |
| 167803                | -1.66            | -1.66            | -4.38             |
| 167053                | 0                | -12.03           | 9.74              |
| 156530                | 0.43             | -13.81           | 73.01             |
| 154789                | 0.55             | 1.07             | 13.04             |
| 156598                | 1.28             | 13.94            | -3.15             |
| 155817                | 2.39             | -41.05           | 2.15              |
| 164517                | 3.45             | 22.26            | 2.58              |
| 157943                | 4.57             | 7.35             | -3.54             |

|        |       |        |        |
|--------|-------|--------|--------|
| 168286 | 6.17  | 9.26   | -6.48  |
| 153859 | 6.34  | -19    | 28.05  |
| 171684 | 10.76 | 8.41   | 4.88   |
| 155464 | 13.31 | -21.39 | -21.49 |
| 166044 | 14.63 | 15.19  | 1.14   |
| 160951 | 16.88 | 19.13  | -1.15  |
| 164610 | 19.07 | -5.11  | 1.39   |
| 164333 | 19.68 | 5.51   | 6.29   |
| 168283 | 20    | 2.97   | -6.13  |
| 164774 | 20.01 | 18.47  | 21.39  |
| 159111 | 28    | 18.85  | 23.4   |
| 164526 | 56.59 | 16.79  | 5.31   |

Data set used to validate microarray detection of induction of transcripts and the strategy of flagellar gene identification based on induction during flagellar regeneration. Gene list consists of the genes identified by Li *et al.* (1) as not being induced according to RT-PCR, as well as four *Chlamydomonas* genes (as indicated) known by Northern analysis not to be induced, as found in the literature.

1. Li, J. B., Gerdes, J. M., Haycraft, C. J., Fan, Y., Teslovich, T. M., May-Simera, H., Li, H., Blacque, O. E., Li, L., Leitch, C. C., *et al.* (2004) *Cell* **117**, 541-552.
