# Supplementary material
Source: PubMed Central journal article supplement (PMC553310)
Supplement: pnas_102_10_3703__3.pdf [file pnas_102_10_3703__3.pdf]

**Table 6. Genes whose products are known to localize to flagella**

| <u>Gene</u><br><u>identification</u> | <u>30 min, %</u> | <u>45 min, %</u> | <u>120 min, %</u> |
|--------------------------------------|------------------|------------------|-------------------|
| 167398 DLC5                          | -20.88           | -15.26           | -11.58            |
| 168923 PF6                           | -5.69            | 34.6             | -30.05            |
| 171599 DHC11                         | -3.27            | 4.97             | -10.14            |
| 161759 DHC3                          | -2.89            | -8.67            | -1.45             |
| 162594 DHC4                          | -1.1             | 11.69            | 5.29              |
| 165162 ODA5                          | -0.4             | -11.64           | 2.73              |
| 169516 DHC1b                         | 1.63             | 4.81             | -7.89             |
| 171127 DHC2                          | 5                | 1.88             | -6.26             |
| 161758 DHC3                          | 5.47             | 11.53            | -3.66             |
| 163907 DHC6                          | 6.62             | 12.65            | 2.7               |
| 162407 DHC5                          | 9.2              | 7.97             | 2.43              |
| 169338 FMG1b                         | 11.36            | 16.8             | 5.48              |
| 158922 IDA2                          | 15.01            | 4.81             | -5.95             |
| 168520 ODA11                         | 17.18            | 9.41             | 1.96              |
| 154251 MST1                          | 27.86            | 34.42            | 9.6               |
| 153556 DHC1                          | 28.78            | 12.12            | 12.87             |
| 161325 DHC7                          | 33.96            | 16.82            | 5.39              |
| 157469 ODA2                          | 34.33            | 14.93            | 7.46              |
| 168243 IFT140                        | 40.74            | 38.52            | 3.7               |
| 160289 ODA4                          | 43.92            | 22.11            | -0.94             |
| 158273 DLC4                          | 51.77            | 13.04            | 1.35              |
| 157911 IFT172                        | 59.1             | 44.48            | -4.07             |
| 158194 FLA10                         | 61.09            | 45.16            | 0.6               |
| 157405 FLA8                          | 66.96            | 21.54            | 2.66              |
| 160144 PP1a                          | 70.3             | 23.89            | -9.21             |
| 168012 FLA3                          | 72.02            | 28.37            | 7.19              |
| <b>155416 RSP2</b>                   | <b>76.14</b>     | <b>40.91</b>     | <b>5.6</b>        |
| <b>157052 MBO2</b>                   | <b>76.19</b>     | <b>40.82</b>     | <b>-5.26</b>      |
| <b>169254 IFT88</b>                  | <b>77.32</b>     | <b>30.59</b>     | <b>-5.96</b>      |
| <b>166736 IDA7</b>                   | <b>92.65</b>     | <b>42.85</b>     | <b>3.51</b>       |
| <b>159022 IFT81</b>                  | <b>106.16</b>    | <b>35.44</b>     | <b>-7.71</b>      |
| <b>168881 Tektin</b>                 | <b>108.69</b>    | <b>73.91</b>     | <b>8.98</b>       |
| <b>166131 PF20</b>                   | <b>118.52</b>    | <b>43.45</b>     | <b>31.97</b>      |
| <b>157798 ODA3</b>                   | <b>127.93</b>    | <b>33.57</b>     | <b>1</b>          |
| <b>156307 D1bLIC</b>                 | <b>133.23</b>    | <b>23.69</b>     | <b>10.76</b>      |
| <b>162279 RSP3</b>                   | <b>143.86</b>    | <b>56.65</b>     | <b>6.06</b>       |
| <b>164295 ODA12</b>                  | <b>159.93</b>    | <b>88.85</b>     | <b>15.33</b>      |
| <b>171226 Tctex1</b>                 | <b>164.74</b>    | <b>45.98</b>     | <b>-8.08</b>      |
| <b>169383 IDA4</b>                   | <b>165.46</b>    | <b>54.52</b>     | <b>26.03</b>      |
| <b>154393 IFT52</b>                  | <b>168.36</b>    | <b>81.09</b>     | <b>5.86</b>       |
| <b>164100 ODA6</b>                   | <b>170.31</b>    | <b>81</b>        | <b>4.73</b>       |
| <b>156214 IFT20</b>                  | <b>183.92</b>    | <b>37.02</b>     | <b>-1.71</b>      |

|        |       |        |        |       |
|--------|-------|--------|--------|-------|
| 155586 | PF2   | 207.12 | 129.09 | -3.74 |
| 164979 | IFT72 | 221.01 | 104.7  | 30.23 |
| 156948 | IFT57 | 232.55 | 56.82  | 19    |
| 167565 | KLP1  | 248.19 | 90.7   | -0.66 |
| 170981 | FAP2  | 248.61 | 81.67  | -9.67 |
| 169795 | DLC7a | 251.48 | 142.96 | 15.57 |
| 159281 | FLA14 | 265.12 | 128.04 | 36.99 |
| 170694 | RIB43 | 270.91 | 119    | 0.63  |
| 171680 | ODA9  | 289.52 | 139.73 | 23.18 |
| 164307 | DLC3  | 316.27 | 133.37 | -5.76 |
| 168602 | DLC1  | 337.65 | 246.55 | 26.75 |
| 171096 | PF16  | 367.77 | 123.03 | -4.21 |
| 168675 | RIB72 | 377.18 | 152.45 | 26.45 |
| 157967 | RSP4  | 382.67 | 240.87 | 30.47 |
| 164722 | ODA13 | 430.58 | 330.93 | 40.97 |
| 169971 | DLC7b | 464.3  | 333.2  | 71.19 |
| 160952 | ODA15 | 676.09 | 213.18 | 43.84 |

Data set used to validate microarray detection of induction of transcripts and the strategy of flagellar gene identification based on induction during flagellar regeneration. Entries in bold type indicate at least 75% induction at either 30 or 45 min after initiation of flagellar regeneration. Plain text indicates genes classified as not induced according to this same criterion. Within each list, entries are sorted in increasing order of induction at  $t = 30$  min. Gene list consists of *Chlamydomonas* proteins shown to localize to flagella either by immunofluorescence or by Western blot analysis.
