# Supplementary material
Source: PubMed Central journal article supplement (PMC553310)
Supplement: pnas_102_10_3703__4.pdf [file pnas_102_10_3703__4.pdf]

**Table 7. Genes whose products localize to other organelles**

## Chloroplast-localized proteins

| <u>Gene ID</u> | <u>30 min, %</u> | <u>45 min, %</u> | <u>120 min, %</u> |
|----------------|------------------|------------------|-------------------|
| 158611 psbW    | -57.02           | -82.3            | -59.07            |
| 160286 THYL    | -37.96           | -51.07           | -27.46            |
| 169972 petM    | -32.22           | -36.25           | 6.46              |
| 165812 petC    | -26.4            | -45.99           | -19.2             |
| 154244 petN    | -18.48           | -58.55           | -36.81            |
| 156157 pgk     | -12.17           | -43.54           | -19.05            |
| 165989 rbcS2   | -3.31            | -51.55           | 5.28              |
| 159627 cema    | -1.81            | -14.54           | 8.18              |
| 154594 minE2   | 4.49             | 3.7              | 0.16              |
| 169504 met1    | 4.98             | 2.99             | 11.25             |

## Nuclear-localized proteins

|               |        |        |       |
|---------------|--------|--------|-------|
| 157840 HFO1   | -23.77 | -7.05  | -6.4  |
| 169457 PSR1   | -12.66 | 2.39   | 9.04  |
| 164461 NUP98  | -4.85  | -9.7   | -4.38 |
| 163504 NUP155 | -1.62  | 8.14   | -0.66 |
| 169614 TOP2   | 1.44   | 8.69   | -2.94 |
| 170696 TOP1   | 5.65   | 14.31  | -7.34 |
| 162123 POLA2  | 7.98   | -4.2   | -5.48 |
| 161483 TFIIA  | 15.74  | -15.66 | 23.88 |
| 152784 Hon1   | 21.87  | 40.62  | 28.9  |
| 157278 PCNA   | 30.77  | 1.44   | 35.81 |

Data set used to validate microarray detection of induction of transcripts and the strategy of flagellar gene identification based on induction during flagellar regeneration. Gene list consists of two sublists: Proteins that localize to chloroplast (*Upper*), and proteins that localize to nucleus (*Lower*).
