# Supplementary material
Source: PubMed Central journal article supplement (PMC553310)
Supplement: pnas_102_10_3703__5.pdf [file pnas_102_10_3703__5.pdf]

**Table 8. Random genes**

| <u>Gene</u><br><u>identification</u> | <u>30 min, %</u> | <u>45 min, %</u> | <u>120 min, %</u> |
|--------------------------------------|------------------|------------------|-------------------|
| 152963                               | -31.45           | -29.29           | -34.06            |
| 153085                               | 6.76             | -13.5            | -3.39             |
| 155554                               | -5.96            | 4.65             | 56.97             |
| 156681                               | -1.98            | -22.83           | 8.41              |
| 157184                               | -9.64            | -7.2             | 14.74             |
| 157482                               | 0.39             | 4.88             | 9.75              |
| 158830                               | -13.7            | -0.96            | -1.94             |
| 159026                               | 36.24            | -2.73            | 21.38             |
| 159393                               | -31.94           | -30.87           | 35.62             |
| 159414                               | -5.94            | -19.13           | 9.89              |
| 160388                               | 11.17            | -11.16           | 3.45              |
| 160518                               | -4               | 16               | -14.7             |
| 162564                               | -8.42            | -19.22           | 0.6               |
| 164658                               | -8.9             | -17              | 29.08             |
| 165045                               | 0.15             | 8.92             | 12.03             |
| 167309                               | 4.27             | -37.77           | -23.03            |
| 167940                               | 34.43            | -18.57           | 21.57             |
| 170062                               | -4.16            | -8.05            | -8.13             |
| 170932                               | 15.57            | 7.53             | 2.49              |
| 171282                               | -4.24            | -10.2            | 0.56              |
| 171962                               | 23.77            | -11.69           | 16.86             |

Data set used to validate microarray detection of induction of transcripts and the strategy of flagellar gene identification based on induction during flagellar regeneration. Gene list was generated by a random number generator, without any information concerning gene identity. Entries sorted by gene identification no.
