# Supplementary material
Source: PubMed Central journal article supplement (PMC553310)
Supplement: pnas_102_10_3703__6.pdf [file pnas_102_10_3703__6.pdf]

**Table 9. Genes induced 100% or more at 30 or 45 min**

| Gene ID       | Known flagellar protein | FABP     | Known induced message | Human ciliary proteome | t=30 (%) | t=45 (%) | t=120 (%) | Protein description                                    |
|---------------|-------------------------|----------|-----------------------|------------------------|----------|----------|-----------|--------------------------------------------------------|
| 152411        |                         |          |                       |                        | 492.99   | 215.92   | 8.84      | hypothetical protein                                   |
| 152476        |                         |          |                       |                        | 158.73   | 74.96    | -10.42    | hypothetical protein                                   |
| 152888        |                         |          |                       |                        | 110.40   | 62.27    | 1.76      | hypothetical protein                                   |
| 152954        |                         |          |                       |                        | 255.78   | 93.46    | 15.25     | hypothetical protein                                   |
| <b>153027</b> | <b>X</b>                |          |                       | <b>X</b>               | 175.08   | 141.24   | 1.52      | nucleoside diphosphate kinase                          |
| 153565        |                         |          |                       |                        | 215.40   | 37.33    | -14.22    | CAH6 carbonic anhydrase (chloroplast)                  |
| 153566        |                         |          |                       |                        | 164.91   | 115.85   | -18.52    | hypothetical protein                                   |
| 153592        |                         |          |                       |                        | 176.88   | 79.07    | -13.47    | hypothetical protein                                   |
| 153593        |                         |          |                       |                        | 293.91   | 209.62   | 14.90     | novel                                                  |
| <b>153658</b> |                         | <b>X</b> | <b>X</b>              |                        | 220.27   | 157.04   | -1.71     | testis expressed gene NYD-SP28                         |
| <b>153853</b> |                         | <b>X</b> | <b>X</b>              |                        | 196.25   | 75.98    | 7.61      | novel                                                  |
| 153940        |                         |          |                       |                        | 152.48   | 31.91    | -7.81     | novel                                                  |
| <b>154005</b> | <b>X</b>                |          |                       |                        | 480.27   | 138.69   | 0.56      | T-complex protein 1 epsilon subunit CCT5               |
| 154182        |                         |          |                       |                        | 165.43   | 43.94    | 45.27     | novel, KH domain                                       |
| 154226        |                         |          |                       |                        | 249.99   | 56.24    | -17.53    | EF-hand protein                                        |
| 154231        |                         |          |                       |                        | 208.96   | 56.70    | 46.69     | no homology                                            |
| <b>154393</b> | <b>X</b>                | <b>X</b> | <b>X</b>              |                        | 168.36   | 81.09    | 5.86      | IFT52/BLD1                                             |
| <b>154652</b> | <b>X</b>                | <b>X</b> |                       | <b>X</b>               | 142.16   | 43.96    | -5.14     | IFT80/Che-2                                            |
| 154693        |                         |          |                       |                        | 429.81   | 258.94   | 34.09     | no homology                                            |
| 154954        |                         |          |                       |                        | 115.69   | 48.13    | 5.47      | novel                                                  |
| 155018        |                         |          |                       |                        | 173.93   | 127.25   | 7.47      | PI3 kinase                                             |
| <b>155023</b> | <b>X</b>                |          |                       |                        | 1382.52  | 151.30   | 6         | HSP70A (flagellar)                                     |
| 155083        |                         |          |                       |                        | 367.92   | 168.46   | -15.56    | no homology                                            |
| <b>155160</b> |                         | <b>X</b> |                       |                        | 282.70   | 119.66   | 14.73     | novel                                                  |
| 155242        |                         |          |                       |                        | 128.92   | 60.59    | 42.36     | CPN2 tubulin folding cofactor B                        |
| 155336        |                         |          |                       |                        | 385.30   | 148.08   | 21.32     | no homology                                            |
| <b>155586</b> | <b>X</b>                | <b>X</b> |                       | <b>X</b>               | 207.12   | 129.09   | -3.74     | PF2 dynein regulatory complex, Growth arrest protein 8 |
| 155801        |                         |          |                       |                        | 126.71   | 183.47   | -3.02     | novel                                                  |
| 155853        |                         |          |                       |                        | 1266.57  | 436.70   | -21.79    | HSP22B (cytosolic)                                     |

|               |          |          |          |         |        |        |                                        |
|---------------|----------|----------|----------|---------|--------|--------|----------------------------------------|
| 155875        |          |          |          | 1853.32 | 860.83 | 5.12   | HSP22A (cytosolic)                     |
| 155958        |          |          |          | 258.36  | 53.31  | 32.11  | AAA ATPase                             |
| <b>155967</b> | <b>X</b> |          |          | 218.21  | 116.10 | 46.04  | T-complex prot 1 delta subunit, CCT4   |
| 155990        |          |          |          | 317.95  | 140.30 | -17.98 | no homology                            |
| 156034        |          |          |          | 183.87  | 83.64  | -1.67  | no homology                            |
| 156038        |          |          |          | 506.54  | 188.67 | 13.91  | glucan 1,4-alpha-glucosidase           |
| <b>156043</b> |          | <b>X</b> | <b>X</b> | 116.06  | 48.75  | 9.94   | MIP-T3 microtubule-interacting protein |
| 156201        |          |          |          | 154.62  | 69.47  | 3.32   | no homology                            |
| <b>156214</b> | <b>X</b> | <b>X</b> |          | 183.92  | 37.02  | -1.71  | IFT20                                  |
| <b>156232</b> | <b>X</b> |          |          | 647.07  | 299.32 | 18.47  | FMG1A                                  |
| <b>156234</b> | <b>X</b> |          |          | 156.09  | 74.42  | 22.96  | FMG1A-like                             |
| 156354        |          |          |          | 138.18  | 38.46  | 29.05  | cytochrome p450 family                 |
| 156724        |          |          |          | 452.53  | 226.27 | 44.25  | <b>Reptin</b>                          |
| 156757        |          |          |          | 176.86  | 91.89  | -3.34  | no homology                            |
| <b>156769</b> | <b>X</b> |          |          | 365.47  | 135.25 | 33.76  | T-complex protein 1 alpha subunit CCT1 |
| 156828        |          |          |          | 123.32  | 66.01  | -13.58 | hypothetical protein                   |
| 156865        |          |          |          | 308.67  | 187    | 63.77  | no homology                            |
| <b>156948</b> | <b>X</b> | <b>X</b> | <b>X</b> | 232.55  | 56.82  | 19     | IFT57                                  |
| 156969        |          |          |          | 500.02  | 221.96 | 27.80  | calcium-binding EF hand protein        |
| <b>157068</b> | <b>X</b> |          |          | 466.31  | 152.34 | 52.90  | T-complex protein 1 beta subunit CCT2  |
| 157193        |          |          |          | 115.91  | 102.96 | -13.63 | novel                                  |
| <b>157216</b> | <b>X</b> | <b>X</b> |          | 144.01  | 67.19  | 11.71  | dynein intermediate chain IC138        |
| 157312        |          |          |          | 237.91  | 57.59  | 4.55   | novel, putative phosphatase            |
| 157731        |          |          |          | 314.14  | 55.55  | 40.04  | DnaJ chaperone                         |
| <b>157798</b> | <b>X</b> |          | <b>X</b> | 127.93  | 33.57  | 1      | ODA3                                   |
| <b>157896</b> |          | <b>X</b> |          | 172.83  | 130.06 | -1.73  | novel                                  |
| <b>157940</b> |          | <b>X</b> |          | 297.77  | 145.75 | -0.56  | Tcte1, t-complex testis expressed      |
| <b>157967</b> | <b>X</b> | <b>X</b> | <b>X</b> | 382.67  | 240.87 | 30.47  | RSP4 flagellar radial spoke protein    |
| 158148        |          |          |          | 152.02  | 45.29  | 2.68   | novel, putative cytochrome p450        |
| <b>158210</b> | <b>X</b> |          | <b>X</b> | 434.08  | 243.83 | 116.95 | beta tubulin                           |
| 158418        |          |          |          | 170.16  | 113.35 | 16.29  | CHLRE_180190 Rab GTPase                |
| 158440        |          |          |          | 240.71  | 55.73  | 10.27  | no homology                            |
| 158643        |          |          |          | 101.23  | 76.69  | 28.22  | novel                                  |

|               |          |          |          |        |        |        |                                               |
|---------------|----------|----------|----------|--------|--------|--------|-----------------------------------------------|
| 158809        |          |          |          | 312.27 | 133.43 | 21.45  | novel                                         |
| <b>158863</b> | <b>X</b> | <b>X</b> | <b>X</b> | 134.99 | 49.99  | -2.50  | <b>Qilin (zebrafish PKD) KIAA0643 protein</b> |
| 158864        |          |          |          | 239.19 | 96.59  | -11.41 | novel                                         |
| 158900        |          |          |          | 253.65 | 72.95  | 23.07  | novel ATP binding                             |
| <b>158903</b> | <b>X</b> |          |          | 234.68 | 139.52 | 35.07  | novel                                         |
| 159012        |          |          |          | 138.74 | 60.23  | 2.15   | novel                                         |
| <b>159022</b> | <b>X</b> | <b>X</b> | <b>X</b> | 106.16 | 35.44  | -7.71  | IFT81                                         |
| 159126        |          |          |          | 109.98 | 60.37  | 6.56   | novel                                         |
| <b>159197</b> | <b>X</b> | <b>X</b> | <b>X</b> | 223.34 | 55.54  | 7.67   | DIP13 deflagellation inducible gene           |
| <b>159203</b> |          |          | <b>X</b> | 250.33 | 91.21  | -6.86  | S926 upregulated message                      |
| <b>159247</b> |          | <b>X</b> | <b>X</b> | 334.95 | 35.71  | -20.73 | novel                                         |
| <b>159281</b> | <b>X</b> |          |          | 265.12 | 128.04 | 36.99  | FLA14 outer dynein arm light chain LC8        |
| 159506        |          |          |          | 525.19 | 206.09 | 103.04 | no homology                                   |
| 159624        |          |          |          | 186.81 | 37.02  | 75.96  | novel                                         |
| 159673        |          |          |          | 286.31 | 94.93  | -3.32  | novel                                         |
| <b>159749</b> | <b>X</b> | <b>X</b> | <b>X</b> | 212.19 | 180.48 | 37.70  | hypothetical protein Q9NQC8                   |
| 159848        |          |          |          | 144.16 | 43.34  | 1.45   | novel                                         |
| 159948        |          |          |          | 120.52 | 43.68  | -38.04 | novel                                         |
| 160014        |          |          |          | 271.79 | 200.16 | 3.91   | novel                                         |
| 160067        |          |          |          | 353.50 | 94.99  | 60     | novel                                         |
| 160123        |          |          |          | 280.30 | 209.34 | 29.38  | Hsp100 family chaperone                       |
| 160204        |          |          |          | 149.61 | 31.50  | 12.33  | novel                                         |
| <b>160297</b> | <b>X</b> | <b>X</b> |          | 371.12 | 219.34 | 83.35  | FABP CG15429 (prototypical cilia class)       |
| 160572        |          |          |          | 197.53 | 57.03  | -1.68  | novel                                         |
| <b>160880</b> |          |          | <b>X</b> | 159.01 | 84     | 6.24   | rhabdoid tumor deleted region protein 1       |
| 160881        |          |          |          | 126.56 | 45.41  | 22.13  | HSP22F                                        |
| 160936        |          |          |          | 159.66 | 146.61 | -2.10  | novel                                         |
| <b>160952</b> | <b>X</b> |          |          | 676.09 | 213.18 | 43.84  | ODA14                                         |
| 160953        |          |          |          | 172.70 | 45.41  | 22.13  | HSP22E                                        |
| 160955        |          |          |          | 148.37 | 106.98 | 10.39  | novel                                         |
| 160959        |          |          |          | 177.04 | 29.33  | -29.08 | novel                                         |
| 161089        |          |          |          | 129.58 | 90.76  | 20.68  | UBC4 E2 ubiquitin conjugating enzyme          |
| 161174        |          |          |          | 266.08 | 105.31 | 12.98  | novel                                         |

|               |          |          |          |          |        |        |                                       |                                       |
|---------------|----------|----------|----------|----------|--------|--------|---------------------------------------|---------------------------------------|
| 161213        |          |          |          | 268.67   | 128.11 | 2      | centrin-like EF-hand protein          |                                       |
| <b>161490</b> |          |          | <b>X</b> | 119.95   | 54.42  | 11.10  | novel                                 |                                       |
| 161556        |          |          |          | 481.47   | 163.93 | 15.97  | unknown P-loop protein                |                                       |
| 161600        |          |          |          | 100.05   | 45.07  | 6.85   | novel                                 |                                       |
| 161728        |          |          |          | 350.65   | 113.56 | -8.83  | novel P-loop protein                  |                                       |
| 161985        |          |          |          | 140.90   | 60.60  | 2.23   | novel                                 |                                       |
| <b>162279</b> | <b>X</b> | <b>X</b> | <b>X</b> | 143.86   | 56.65  | 6.06   | RSP3                                  |                                       |
| 162390        |          |          |          | 425.99   | 124.27 | 34.97  | helix-turn-helix transcription factor |                                       |
| <b>162417</b> |          |          | <b>X</b> | 477.88   | 175.80 | 78.92  | c-myc binding protein MYCBP/AMY-1     |                                       |
| 162425        |          |          |          | 125.61   | 73.73  | -4.88  | novel                                 |                                       |
| <b>162449</b> |          | <b>X</b> |          | 178.70   | 91.19  | -3.76  | novel                                 |                                       |
| 162472        |          |          |          | 113.29   | 55.28  | -6.58  | novel                                 |                                       |
| 162692        |          |          |          | 200.82   | 87.98  | 14.62  | novel                                 |                                       |
| <b>162703</b> |          | <b>X</b> | <b>X</b> | <b>X</b> | 724.23 | 436.64 | 87.70                                 | <b>PACRG parkin co-regulated gene</b> |
| 162999        |          |          |          | 154.73   | 83.90  | 57.87  | DnaJ protein                          |                                       |
| 163048        |          |          |          | 145.60   | 53.08  | 23.77  | EF1G elongation factor                |                                       |
| 163083        |          |          |          | 197.86   | 52.69  | 6.72   | novel                                 |                                       |
| <b>163193</b> |          | <b>X</b> | <b>X</b> | 161.35   | 80.24  | -6.28  | FABP CG4525 (compartment class)       |                                       |
| 163279        |          |          |          | 134.65   | 84.89  | -13.89 | novel                                 |                                       |
| 163322        |          |          |          | 144.14   | 71.86  | 26.63  | novel                                 |                                       |
| <b>163462</b> | <b>X</b> |          |          | 414.85   | 187.67 | 23.46  | T-complex protein 1 zeta subunit CCT6 |                                       |
| <b>163587</b> | <b>X</b> |          |          | 209.71   | 120.55 | 64.97  | T-complex protein1 theta subunit CCT8 |                                       |
| 163755        |          |          |          | 196.05   | 89.62  | 67.90  | novel                                 |                                       |
| 163765        |          |          |          | 300      | 80.53  | -15.66 | novel                                 |                                       |
| 164079        |          |          |          | 241.56   | 101.96 | 74.68  | SKP1 E3 ubiquitin ligase              |                                       |
| <b>164100</b> | <b>X</b> | <b>X</b> |          | 170.31   | 81     | 4.73   | ODA6                                  |                                       |
| 164108        |          |          |          | 137.16   | 44.60  | 16.23  | plasma membrane Ca-transport ATPase 9 |                                       |
| 164110        |          |          |          | 132.17   | 51.83  | -15.68 | novel                                 |                                       |
| <b>164149</b> |          | <b>X</b> | <b>X</b> | 117.95   | 77.94  | 6.19   | novel                                 |                                       |
| 164270        |          |          |          | 207.92   | 101.28 | 14.40  | novel                                 |                                       |
| <b>164295</b> | <b>X</b> | <b>X</b> |          | 159.93   | 88.85  | 15.33  | ODA12                                 |                                       |
| <b>164296</b> | <b>X</b> |          |          | 374.62   | 145.98 | 93.62  | axonemal dynein light chain DNAL4     |                                       |
| <b>164307</b> | <b>X</b> | <b>X</b> |          | 316.27   | 133.37 | -5.76  | DLC3 outer arm light chain 3          |                                       |

|               |          |          |          |        |        |        |                                                      |
|---------------|----------|----------|----------|--------|--------|--------|------------------------------------------------------|
| 164442        |          |          |          | 204.79 | 73.43  | 35.41  | no homology                                          |
| 164501        |          |          |          | 142.10 | 74.73  | 43.15  | novel                                                |
| <b>164561</b> | <b>X</b> | <b>X</b> |          | 129.22 | 93.45  | 24.46  | novel                                                |
| <b>164568</b> | <b>X</b> |          |          | 255.91 | 123.45 | 25.82  | zinc finger, MYND domain containing protein          |
| <b>164620</b> | <b>X</b> |          | <b>X</b> | 345.71 | 192.45 | 114.43 | TUA1 alpha tubulin                                   |
| <b>164722</b> | <b>X</b> |          | <b>X</b> | 430.58 | 330.93 | 40.97  | ODA13 outer dynein arm docking complex protein       |
| 164832        |          |          |          | 112.69 | 79.80  | 14.56  | novel                                                |
| 164954        |          |          |          | 126.28 | 97.08  | 16.78  | novel                                                |
| <b>164979</b> | <b>X</b> | <b>X</b> |          | 221.01 | 104.70 | 30.23  | IFT74/72                                             |
| <b>165023</b> | <b>X</b> |          |          | 510.23 | 167.20 | 32.89  | T-complex protein 1 eta subunit CCT7                 |
| <b>165057</b> |          | <b>X</b> |          | 576.51 | 136.48 | -2.35  | FABP CG31623 (motility class)                        |
| 165138        |          |          |          | 185.83 | 109.37 | 1.81   | novel                                                |
| <b>165606</b> |          | <b>X</b> | <b>X</b> | 389.99 | 208.84 | 67.13  | hypothetical protein Q9H1X1                          |
| <b>165719</b> |          | <b>X</b> |          | 106.92 | 90.20  | 13.70  | novel                                                |
| 165743        |          |          |          | 114.97 | 56.46  | -5.46  | novel                                                |
| 165780        |          |          |          | 545.77 | 38.01  | -13.90 | CLPB2 chaperone Hsp101 type                          |
| 166022        |          |          |          | 149.81 | 96.61  | 38.17  | novel                                                |
| <b>166039</b> |          | <b>X</b> |          | 426    | 172.13 | 6.85   | FABP CG11035 (prototypical cilia class) DnaJ protein |
| 166074        |          |          |          | 286.01 | 127.81 | 11.13  | novel EF hand protein                                |
| 166081        |          |          |          | 209.37 | 62.50  | -19.28 | novel ATP-binding                                    |
| <b>166131</b> | <b>X</b> | <b>X</b> | <b>X</b> | 118.52 | 43.45  | 31.97  | PF20 central pair protein                            |
| 166294        |          |          |          | 116.92 | 145.14 | -2.50  | novel                                                |
| 166301        |          |          |          | 142.13 | 34.39  | -27.52 | novel                                                |
| 166390        |          |          |          | 202.10 | 86.01  | 27.74  | novel                                                |
| 166776        |          |          |          | 169.57 | 57.35  | 8.34   | HSP22C                                               |
| 166783        |          |          |          | 185.38 | 96.35  | 11.59  | novel                                                |
| 166839        |          |          |          | 264.39 | 61.81  | 10.16  | SPT2 serine palmitoyltransferase                     |
| 166849        |          |          |          | 159.42 | 89.85  | 4.34   | novel                                                |
| 166905        |          |          |          | 177.27 | 96.70  | 5.20   | novel                                                |
| 166967        |          |          |          | 186.34 | 186.79 | 27.75  | novel                                                |
| 166968        |          |          |          | 121.83 | 79.78  | -7.20  | CHLRE_550086 Rab-type G protein                      |
| 167072        |          |          |          | 102.40 | 65.46  | 20.36  | novel                                                |
| 167154        |          |          |          | 102.70 | 35.13  | 24.32  | novel                                                |

|               |          |          |          |          |         |        |        |                                            |
|---------------|----------|----------|----------|----------|---------|--------|--------|--------------------------------------------|
| <b>167190</b> |          | <b>X</b> |          |          | 88.59   | 105.02 | -14.73 | Tbx1                                       |
| 167311        |          |          |          |          | 222.15  | 55.70  | 4.70   | HSP70E                                     |
| <b>167565</b> | <b>X</b> |          |          |          | 248.19  | 90.70  | -0.66  | KLP1 central pair kinesin                  |
| 167670        |          |          |          |          | 121.97  | 13.23  | 31.83  | novel, sterol c14-reductase like           |
| 167696        |          |          |          |          | 124.48  | 83.25  | 9.49   | novel                                      |
| <b>167776</b> |          | <b>X</b> | <b>X</b> | <b>X</b> | 110.06  | 37.10  | 33.84  | <b>Dpy-30</b>                              |
| <b>168135</b> |          | <b>X</b> |          |          | 319.14  | 143.27 | 29.38  | FABP CG10064 (motility class),WD40 repeats |
| <b>168312</b> |          | <b>X</b> |          |          | 197.51  | 103.01 | 18.12  | FABP                                       |
| <b>168339</b> |          | <b>X</b> | <b>X</b> |          | 443.10  | 126.61 | -7.46  | FABP CG18675 (motility class)              |
| <b>168434</b> |          | <b>X</b> |          |          | 269.73  | 135.18 | 6.97   | TSARG2 testis & spermatogenesis prot. 2    |
| 168471        |          |          |          |          | 338.39  | 95.90  | 89.74  | no homology                                |
| 168546        |          |          |          |          | 80.11   | 203.34 | 27.97  | novel                                      |
| 168596        |          |          |          |          | 275.69  | 76.52  | 38.48  | cytochrome p450-like                       |
| <b>168600</b> |          | <b>X</b> |          | <b>X</b> | 338.88  | 65.74  | -6.63  | nasopharyngeal epithelia specific protein  |
| <b>168602</b> | <b>X</b> | <b>X</b> |          |          | 337.65  | 246.55 | 26.75  | DLC1 outer arm light chain 1               |
| 168662        |          |          |          |          | 402.16  | 53.02  | 20.39  | novel                                      |
| <b>168675</b> | <b>X</b> | <b>X</b> |          |          | 377.18  | 152.45 | 26.45  | Rib72 flagellar pf ribbon protein          |
| <b>168790</b> | <b>X</b> |          |          | <b>X</b> | 610.32  | 166.01 | 14.31  | RSP23 p61 nucleoside diphosphate kinase    |
| <b>168881</b> | <b>X</b> | <b>X</b> |          | <b>X</b> | 108.69  | 73.91  | 8.98   | Tektin                                     |
| 168906        |          |          |          |          | 349.32  | 121.42 | 29.29  | no homology                                |
| 168911        |          |          |          |          | 271.06  | 153.50 | 12.28  | novel WD-40 protein                        |
| 168935        |          |          |          |          | 135.04  | 78.06  | -0.89  | MAK kinase                                 |
| 168989        |          |          |          |          | 272.98  | 189.69 | 26.96  | heat shock protein                         |
| 169068        |          |          |          |          | 164.29  | 86.32  | 9.11   | novel                                      |
| 169116        |          |          |          |          | 222.48  | 92.28  | 15.73  | <b>Pontin</b>                              |
| 169215        |          |          |          |          | 168.84  | 88.41  | -6.15  | novel                                      |
| <b>169301</b> | <b>X</b> |          |          | <b>X</b> | 1759.65 | 356.88 | 10.26  | HSP90A (flagellar)                         |
| 169310        |          |          |          |          | 123.35  | 69.96  | 12.28  | novel                                      |
| <b>169383</b> | <b>X</b> | <b>X</b> |          |          | 165.46  | 54.52  | 26.03  | IDA4                                       |
| 169414        |          |          |          |          | 158.50  | 102.92 | 48.36  | phosphatase                                |
| 169511        |          |          |          |          | 169.75  | 59.21  | -3.15  | HSP70B                                     |
| 169604        |          |          |          |          | 349.35  | 106.49 | 28.33  | no homology                                |
| <b>169795</b> | <b>X</b> | <b>X</b> |          |          | 251.48  | 142.96 | 15.57  | DLC7a outer arm light chain 7              |

|               |          |          |          |          |        |        |        |                                                |
|---------------|----------|----------|----------|----------|--------|--------|--------|------------------------------------------------|
| <b>169905</b> | <b>X</b> |          | <b>X</b> | <b>X</b> | 418.67 | 214.58 | 97.42  | TUB1 beta tubulin                              |
| <b>169971</b> | <b>X</b> | <b>X</b> |          |          | 464.30 | 333.20 | 71.19  | DLC7b dynein light chain, roadblock-like       |
| 169998        |          |          |          |          | 291.16 | 166.31 | 22.81  | novel                                          |
| 170001        |          |          |          |          | 377.83 | 172.12 | 24.71  | no homology                                    |
| <b>170055</b> | <b>X</b> |          | <b>X</b> | <b>X</b> | 418.67 | 214.58 | 97.42  | TUB2 beta tubulin                              |
| 170098        |          |          |          |          | 119.65 | 105.06 | 12.65  | HSP70-like protein                             |
| 170205        |          |          |          |          | 110.37 | 30.37  | -38.62 | novel                                          |
| 170392        |          |          |          |          | 490.28 | 98.97  | 0.03   | <b>TULP2, Tubby-like protein 2</b>             |
| <b>170435</b> | <b>X</b> |          |          | <b>X</b> | 120.21 | 30.94  | -29.68 | AKAP-associated sperm protein                  |
| 170693        |          |          |          |          | 179.30 | 73.50  | 22.10  | CPN10 chaperone                                |
| <b>170694</b> | <b>X</b> | <b>X</b> |          |          | 270.91 | 119    | 0.63   | Rib43a flagellar pf ribbon protein             |
| 170718        |          |          |          |          | 211.70 | 64.45  | 50.86  | myo-inositol-1-phosphase synthase              |
| <b>170981</b> | <b>X</b> | <b>X</b> |          |          | 248.61 | 81.67  | -9.67  | Tctex2b, homology to outer arm light chain lc2 |
| 171050        |          |          |          |          | 100.70 | 74.86  | 7.61   | novel                                          |
| <b>171096</b> | <b>X</b> |          |          | <b>X</b> | 367.77 | 123.03 | -4.21  | PF16 flagellar central pair protein, SPAG6     |
| <b>171102</b> |          | <b>X</b> | <b>X</b> | <b>X</b> | 431.10 | 197.22 | 16.93  | Mus musculus testis-specific cDNA AK017056     |
| 171153        |          |          |          |          | 123.45 | 90.10  | -16.73 | novel                                          |
| 171156        |          |          |          |          | 948.01 | 324.86 | 18.60  | novel                                          |
| <b>171226</b> | <b>X</b> | <b>X</b> |          |          | 164.74 | 45.98  | -8.08  | Tctex1 inner arm dlc                           |
| 171275        |          |          |          |          | 338.27 | 237.46 | 12.93  | no homology                                    |
| <b>171680</b> | <b>X</b> | <b>X</b> |          |          | 289.52 | 139.73 | 23.18  | ODA9 flagellar outer arm IC78                  |
| 171729        |          |          |          |          | 86.56  | 147.55 | 19.07  | novel                                          |
| 171752        |          |          |          |          | 260.13 | 57.31  | 37.90  | SC5D delta7-sterol-C5 desaturase               |
| <b>171782</b> | <b>X</b> | <b>X</b> |          |          | 243.78 | 57.89  | 31.03  | <b>ARL6/BBS3</b>                               |
| <b>171911</b> |          | <b>X</b> | <b>X</b> |          | 153.40 | 43.84  | -9.11  | meiosis-specific nuclear structural protein    |
| 172025        |          |          |          |          | 416.26 | 171.33 | 4.41   | no homology                                    |

Entries in bold indicate genes with prior information about flagellar association, based on localization, comparative genomics, induction or proteomics, as indicated in columns 2-5. In the protein description column, FABP stands for flagellar basal body proteome.
